# Supplementary material for: Effects of the Diet on the Microbiota of the Red Palm Weevil (Coleoptera: Dryophthoridae)
Source: PLoS One. 2015 Jan 30;10(1):e0117439. doi: 10.1371/journal.pone.0117439 (PMC4311986; doi:10.1371/journal.pone.0117439)
Supplement: S3 Table — (XLSX) [file pone.0117439.s008.xlsx]

## Sheet: Table_S3
S3 Table. Identification at Family level of the bacterial communities associated with the 12 weevil samples.
Weevil group	RPW palm			RPW apple						R. vulneratus
Bacterial taxon/weevil sample	RPW_palm_m1	RPW_palm_f1	RPW_palm_f2	RPW_apple_m1	RPW_apple_m2	RPW_apple_m3	RPW_apple_f1	RPW_apple_f2	RPW_apple_f3	R_vulneratus_m1	R_vulneratus_f1	R_vulneratus_f2
Unclassified	0	0	0	0	0	0.0228206	0	0	0	0	0	0
Other Bacteria	4.30163	3.06273	1.92664	0.0964785	0.637035	0.524874	0.573319	0.196873	0	0.328022	0.637213	2.7507
Acidobacteria
Acidobacteriaceae	0	0	0	0	0	0	0	0	0	0.0184094	0	0
RB40	0.137104	0	0.0370508	0	0	0	0	0	0	0	0	0
mb2424	0.0342759	0.0184502	0.0185254	0	0	0	0	0	0	0	0	0
Solibacteraceae	0.0685518	0	0	0	0	0	0	0	0	0	0	0
Other Acidobacteria	0.205655	0.0922509	0.185254	0	0	0	0	0	0	0.00167358	0	0.636048
Actinobacteria
C111	0.0342759	0	0.0185254	0	0	0	0	0	0	0	0	0
Microthrixaceae	0.188518	0	0	0	0	0	0	0	0	0	0	0
ZA3409c	0	0	0	0	0.130303	0	0	0	0	0	0	0
Actinomycetaceae	0.17138	0.221402	0.0370508	0	0	0	0.00735024	0	0	0.00167358	0.0424809	0
Beutenbergiaceae	0	0	0	0	0	0	0	0	0	0.00167358	0	0
Brevibacteriaceae	0	0	0	0	0	0	0	0	0	0.0284509	0	0
Cellulomonadaceae	3.13625	4.20664	1.14857	0	0	0	0	0	0	0	0.0849618	0
Corynebacteriaceae	0	0.0553506	0	0	0	0.0456413	0.29401	0.0231616	0.179641	0.207524	0	0.462581
Dermabacteraceae	0	0	0	0	0	0	0	0	0	0.0953943	0	0
Frankiaceae	0	0	0.0370508	0	0	0	0	0	0	0	0	0
Gordoniaceae	0.205656	0.553506	1.18562	0	0	0	0	0	0	0.0317981	0	0.520403
Intrasporangiaceae	0.017138	0.0184502	0.0741015	0	0	0	0	0	0	0	0	0
Microbacteriaceae	1.14824	6.36531	6.83587	0.566811	0.289561	0.102693	0.61742	3.14997	0.718563	2.93714	3.31351	1.96597
Micrococcaceae	0.0514139	0	0.0741015	0	0	0	0.0147005	0	0.11976	0	0	0.594746
Micromonosporaceae	0.479863	0	0	0	0	0	0	0	0	0	0	0
Mycobacteriaceae	0	0.110701	0.0741015	0	0	0	0	0	0	0	0	0.115645
Nakamurellaceae	0.0685518	0	0.0185254	0	0	0	0	0	0	0	0	0
Nocardioidaceae	1.59383	4.40959	5.74287	0	0	0	0	0	0	0.0184094	0.0849618	0
Promicromonosporaceae	0	0.258303	0.389033	0	0	0	0	0	0	0	0	0
Propionibacteriaceae	0	0	0	0	0	0	0.0441014	0.0926462	0.239521	0.0334717	0.169924	2.91591
Pseudonocardiaceae	0	0	0	0	0	0	0	0	0	0	0	0.00826037
Streptomycetaceae	0.017138	0.0738007	0.889218	0	0	0	0	0	0	0.0451868	0	0
Streptosporangiaceae	0	0	0.0370508	0	0	0	0	0	0	0	0	0
Tsukamurellaceae	0	0	0	0	0	0	0	0	0	0	0	0.90038
Bifidobacteriaceae	0	0	0	0	0	0	0	0	0	0.00669434	0	0
AK1AB1_02E	0.0856898	0.221402	0	0	0	0	0	0	0	0	0	0
Gaiellaceae	0	0	0	0	0	0	0	0	0	0	0	0.578226
Patulibacteraceae	0	0.0553506	0.129678	0	0	0	0	0	0	0	0	0
Solirubrobacteraceae	0	0	0.0555761	0	0	0	0	0	0	0	0	0
Other Actinobacteria	4.1988	4.48339	2.01927	0	0.0144781	0.0456413	0.279309	0.0463231	0.0598802	0.225934	0.0849618	1.44556
Armatimonadetes
Armatimonadaceae	0.0685518	0	0	0	0	0	0	0	0	0	0	0
Fimbriimonadaceae	0.0342759	0.166052	0.0185254	0	0	0	0	0	0	0	0	0
Other Armatimonadetes	0.0685518	0	0	0	0	0	0	0	0	0	0	0
Bacteroidetes
Bacteroidaceae	0	0	0	0.0120598	0.101346	0	0.161705	0	0.239521	0.00167358	0	0
Porphyromonadaceae	0.0514139	0	0	6.64496	6.76126	1.91693	1.6391	0.729589	0.0598802	0	0.169924	0.503882
Prevotellaceae	0.017138	0.0738007	0	0	0	0.0114103	0	0	0	0	0.0424809	0
Rikenellaceae	0	0	0	0	0.0579123	0	0	0	0	0	0	0
S24-7	0.0514139	0	0	0	0	0	0	0	0	0	0	0
VC21_Bac22	0	0	0	0	0.130303	0	0	0	0	0	0	0
Paraprevotellaceae	0	0	0	0	0	0	0.0220507	0	0	0	0	0
Cryomorphaceae	0.0856898	0	0.203779	0	0	0	0	0	0	0	0	0
Flavobacteriaceae	0.856898	2.93358	3.51982	0	0	0	0.536567	0.0115808	0	0	0.339847	3.53544
Chitinophagaceae	2.72494	1.80812	1.37088	0.0361795	0	0	0.139655	0.277939	0	0.0301245	0	0.44606
Flammeovirgaceae	0.75407	0.535055	0.0926269	0	0	0	0	0	0	0	0	0.00826037
Flexibacteraceae	0.0856898	0	1.64876	0	0	0	0	0	0	0	0	0.421279
Saprospiraceae	0.514139	1.25461	0.759541	0	0	0	0	0	0	0	0	0
Sphingobacteriaceae	0.0685518	0.99631	1.53761	0	0	0	0.00735024	0	0	0.907083	0.254885	5.4601
Other Bacteroidetes	0.92545	1.08856	0.759541	0	0.0579123	0.0114103	1.88901	0	0	0	0.0424809	0.627788
Chloroflexi
Anaerolinaceae	0.0342759	0	0.833642	0	0	0	0	0	0	0	0	0
Caldilineaceae	0.119966	0.553506	0.426084	0	0	0	0	0	0	0	0	0
A4b	1.26821	0.0369004	0.0555761	0	0	0	0	0	0	0	0	0
Other Chloroflexi	0.239931	0.405904	0.333457	0	0.0144781	0	0	0	0	0	0	0
Fibrobacteres
Fibrobacteraceae	0.017138	0	0	0	0	0	0	0	0	0	0	0
Other Fibrobacteres	3.32476	0.184502	0.0370508	0	0	0	0	0	0	0	0	0
Firmicutes
Bacillaceae	0	0	0	0	0	0	0.00735024	0	0	0.068617	0.0424809	0.132166
Paenibacillaceae	0.137104	0.0738007	0	0	0	0	0.029401	0.416908	0	0	0	0.660829
Planococcaceae	0	0	0	0	0	0	0.00735024	0	0	0	0	0
Staphylococcaceae	0	0	0.0555761	0	0	0	0.00735024	0	0	0.164011	0.807137	0.289113
Aerococcaceae	0	0	0	0	0	0	0	0	0	0	0	0.735173
Enterococcaceae	0	0	0.0370508	0.67535	11.5245	9.02556	0.235208	0.0115808	0	0	0	0
Lactobacillaceae	0	0	0	15.328	2.09932	5.64811	3.66777	0.74117	2.75449	6.78471	2.16653	0.181728
Leuconostocaceae	0	0	0	40.8828	22.1514	14.5367	5.07166	2.16561	22.1557	69.191	41.2065	1.37122
Streptococcaceae	0	0	0	4.48625	13.6239	4.95208	11.0548	2.92994	18.7425	0.353126	0.382328	0.619528
Catabacteriaceae	0.017138	0	0	0	0	0	0	0	0	0	0	0
Clostridiaceae	0	0	0	0.0120598	0	0	0	0.0231616	0	0.0384924	0	2.30464
Lachnospiraceae	0.0856898	0.0184502	0	3.72648	1.6505	6.00183	1.74201	0.6022	0	0	0	0.173468
Peptococcaceae	0.0342759	0	0	0	0	0	0	0	0	0	0	0
Peptostreptococcaceae	0	0	0	0	0.0868684	0	0	0.0115808	0	0	0	0
Ruminococcaceae	0.0856898	0	0	0	0	0.0114103	0.0220507	0	0.239521	0.0150623	0.0424809	0
Veillonellaceae	0	0	0	0	0.0434342	0	0.0147005	0.0347423	0	0.343085	0.594732	0.396498
Coriobacteriaceae	0	0	0	0	0	0	0	0	0	0.00669434	0	0
Erysipelotrichaceae	0.0514139	0	0	0.0723589	0.0144781	0.433592	1.33774	0	0	0	1.52931	0.140426
Other Firmicutes	0.0856898	0.0369004	0.0370508	0.916546	0.593601	1.6545	0.418964	0.115808	0.0598802	0.0987415	1.48683	0
Fusobacteria
Fusobacteriaceae	0	0	0	0	0	0.0114103	0.00735024	0.0347423	0	0	0.46729	0
Other Bacteria	0.239931	0.110701	0.259355	0	0.188215	0	0	0	0	0.00334717	0	0
Planctomycetes
Isosphaeraceae	0.0856898	0	0	0	0	0	0.00735024	0	0	0.0569019	0	0
Pirellulaceae	0.514139	0.369004	0.0741015	0	0	0	0	0	0	0	0	0.0165207
Planctomycetaceae	1.01114	0.590406	0.222305	0	0	0	0	0	0	0.040166	0	0.272592
Other Planctomycetes	0.137104	0.369004	0.0741015	0	0.0144781	0	0	0	0	0.0100415	0	0
Proteobacteria
Caulobacteraceae	1.19966	0.940959	1.18562	0	0	0	0.0367512	0	0	0.0301245	0.127443	0.768214
Kiloniellaceae	0.0514139	0	0	0	0	0	0	0	0	0	0	0
Aurantimonadaceae	0.0342759	0.0738007	0.0185254	0	0	0	0	0	0	0	0	0
Bradyrhizobiaceae	0.359897	0	0.0370508	0	0	0	0	0	0	0.0669434	0.0424809	1.2721
Brucellaceae	0	0	0	0	0.0289561	0	0	0	0.479042	0	2.80374	0
Hyphomicrobiaceae	6.0497	3.28413	2.81586	0	0	0	0	0	0	0.0652698	0.339847	0.966463
Methylocystaceae	0.17138	0	0	0	0	0	0.0147005	0	0	0	0.0849618	0.693871
Phyllobacteriaceae	3.59897	5.1845	4.64987	0	0	0	0	0	0	0.202504	0	1.28862
Rhizobiaceae	3.41045	1.16236	2.2601	0	0	0	0	0	0.0598802	0.866917	0.0849618	0.355196
Xanthobacteraceae	0	0	0.0370508	0	0	0	0	0	0	0.117151	0	0.371717
Hyphomonadaceae	0.102828	0.0922509	0.0741015	0	0	0	0	0	0	0	0	0
Rhodobacteraceae	2.87918	24.1697	8.57725	0	0.0723903	0	0.0661521	0.0231616	0	0.865243	0.679694	2.92417
Acetobacteraceae	0.17138	0.221402	0.203779	8.93632	2.80874	18.2793	45.9831	62.7099	29.6407	0.615879	0.254885	0.338675
Rhodospirillaceae	0.548415	0.110701	0.0741015	0.0120598	0.0289561	0	0	0	0	0	0	0
Pelagibacteraceae	0	0	0	0	0.0434342	0	0	0	0	0	0	0
mitochondria	0.0514139	0.0369004	0	0	0.0289561	0	0.0220507	0.0115808	0	0.0184094	0.212404	0.0330415
Erythrobacteraceae	1.59383	2.17712	1.07447	0	0	0	0	0	0	0.0334717	0	0
Sphingomonadaceae	0.239931	0.664207	1.46351	0	0	0	0	0.0115808	0	0.28953	0	0.619528
Alcaligenaceae	0.0685518	0	0.0741015	0	0	0	0	0	0	0.0334717	0	0.23129
Comamonadaceae	2.82776	0.461255	0.72249	2.89436	2.08484	0.855774	5.63028	13.2137	6.0479	8.306	19.5412	5.69139
Oxalobacteraceae	0	0	0	0	0.0144781	0	0.0147005	0	0	2.38988	8.41121	38.9394
Methylophilaceae	0	0	0.111152	0	0	0	0	0	0	0	0	0
Neisseriaceae	0	0	0	0	0	0	0	0	0.0598802	0	0	0.107385
Nitrosomonadaceae	0.291345	0	0	0	0	0	0	0	0	0	0	0
Rhodocyclaceae	0.137104	0	0	0	0	0	0	0.0115808	0	0	0	0.0247811
Bacteriovoracaceae	0	0.258303	0.0185254	0	0	0	0	0	0	0	0	0
Bdellovibrionaceae	0	0.0184502	0	0	0	0	0	0	0	0	0	0
Nitrospinaceae	0	0	0	0	0.0289561	0	0	0	0	0	0	0
Geobacteraceae	0	0	0	0	0	0.0114103	0	0	0.299401	0	0	0
0319-6G20	0.017138	0	0	0	0	0	0	0	0	0	0	0
Haliangiaceae	0.017138	0	0	0	0	0	0	0	0	0	0	0
Polyangiaceae	0.0685518	0	0	0	0	0	0	0	0	0	0	0
JTB36	0	0	0	0	0.0579123	0	0	0	0	0	0	0
Desulfobacteraceae	0	0	0	0	1.0569	0	0	0	0	0	0	0
Syntrophobacteraceae	0.017138	0	0	0	0	0	0	0	0	0	0	0
Campylobacteraceae	0	0	0	0	0.0289561	0	0	0	0	0	0.0849618	0.23129
Aeromonadaceae	0.0342759	0	0	0	0	0	0	0	0	0	0	0.148687
Succinivibrionaceae	0.0685518	0	0	0	0	0	0	0	0	0	0	0
Alteromonadaceae	0.239931	0.424354	0	0	0	0	0	0	0	0	0	0
Idiomarinaceae	0	0	0	0	0.0144781	0	0	0	0	0	0	0
Enterobacteriaceae	0.0514139	0.350554	3.05669	13.2176	6.90604	19.9224	12.8041	5.55877	4.8503	1.4443	2.16653	1.74294
FCPT525	0.0685518	0	0	0	0	0	0	0	0	0	0	0
211ds20	0.445587	0.147601	0.0185254	0	0	0	0	0	0	0	0	0
Coxiellaceae	0.0685518	0	0	0	0	0	0	0	0	0.0117151	0	0
Legionellaceae	0	0.0738007	0.0185254	0	0	0	0	0	0	0.105436	0.0424809	0.090864
Halomonadaceae	0	0	0	0	0.0723903	0	0	0	0	0	0	0
SUP05	0	0	0	0	0.159259	0	0	0	0	0	0	0
Pasteurellaceae	0	0	0	0	0	0.0114103	0.0367512	0.0579039	0	0	3.56839	0.586486
Moraxellaceae	0.274207	0.461255	5.77992	0	0	0	0.0367512	0.0231616	0.11976	0.37823	0.0849618	2.61854
Pseudomonadaceae	2.07369	1.25461	5.94665	0.0120598	16.6063	7.47376	0.396913	0	0.11976	0.0133887	0.0424809	0.925161
Salinisphaeraceae	0	0	0	0	0.0144781	0	0	0	0	0	0	0
Thiohalorhabdaceae	0	0	0	0	0.0289561	0	0	0	0	0	0	0
Piscirickettsiaceae	0	0	0	0	0.0144781	0	0	0	0	0	0	0
Sinobacteraceae	4.81577	1.07011	0.96332	0	0	0	0	0	0	0	0	0
Xanthomonadaceae	15.8526	8.59779	15.1538	0.0964785	0.0868684	0.148334	4.02058	0.521135	0.179641	0.132213	0.127443	2.18074
Other Proteobacteria	19.7772	10.1661	10.3001	0.241196	7.29695	5.69375	0.213157	0.185292	0.658683	1.19159	6.11725	4.82405
SAR406
A714017	0	0	0	0	1.28855	0	0	0	0	0	0	0
Other SAR 406	0	0	0	0	0.0144781	0	0	0	0	0	0	0
Spirochaetes
Spirochaetaceae	0.0342759	0	0	0	0	0	0	0	0	0	0	0
ST-3K10	0	0	0	0	0.159259	0	0	0	0	0	0	0
MSBL8	0	0	0	0	0.0579123	0	0	0	0	0	0	0
TM7
Rs-045	0	0.0553506	0	0	0	0	0	0	0	0	0	0
Other TM7	0.874036	2.49077	1.87106	0	0	0	0.0147005	0	0	0.661066	0.764656	0.636048
Tenericutes
Acholeplasmataceae	0.0342759	0.0738007	0	0	0	0	0	0	0	0	0	0
Entomoplasmataceae	0	0	0	1.13362	0.781816	2.63578	0.852628	6.05675	11.9162	0	0.127443	0
Mycoplasmataceae	0	0	0	0	0	0	0	0	0	0.0150623	0	0
Other Tenericutes	0	0	0	0	0	0.0114103	0	0	0	0.0518811	0.297366	0
Thermi
Deinococcaceae	0.017138	0	0.0370508	0	0	0	0	0	0	0	0	0
Verrucomicrobia	0	0	0	0	0	0	0	0	0	0	0	0
Opitutaceae	1.06255	0.147601	0.0926269	0	0	0	0	0	0	0	0	0
Verrucomicrobiaceae	0.257069	0.0184502	0	0	0.0144781	0	0	0	0	0	0	0.198249
Chthoniobacteraceae	0.0342759	0	0.0741015	0	0	0	0	0	0	0	0	0
Other Verrucomicrobia	0.0685518	0	0	0	0.0144781	0	0	0	0	0	0	0
